# Supplementary material for: Spectral characterization of postage stamp printing inks by means of Raman spectroscopy
Source: Royal Society of Chemistry journal article supplement (doi:10.1039/c4an01616e), 2015-01-01
Supplement: c4an01616e1.pdf [file c4an01616e1.pdf]

## Supporting Information for

# Spectral characterization of postage stamps printing inks by means of Raman spectroscopy

Eleonora Imperio<sup>[b]</sup>, Gabriele Giancane\*<sup>[c]</sup> and Ludovico Valli<sup>[a]</sup>.

[a] Department of Biological and Environmental Science and Technologies, Università del Salento, Via Monteroni, 73100 Lecce (Italy)

[b] Department of Innovation Engineering, Università del Salento, Via Monteroni, 73100 Lecce (Italy)

[c] Department of Cultural Heritage, Università del Salento, Via D. Birago, 73100 Lecce (Italy) E-mail: gabriele.giancane@unisalento.it

**Description:** Contains one table: lists all postage stamps of the Kingdom of Italy and the Italian Republic exemplars studied.

### Kingdom of Italy

| Issue Year                                     | Specimen                                                                   |
|------------------------------------------------|----------------------------------------------------------------------------|
| February 1862<br><i>(Vittorio Emanuele II)</i> | 10c yellowish bistre<br>20c indigo<br>40c carmine red<br>80c orange yellow |
| April 1863                                     | 10c yellow ochre                                                           |
| December 1863/1865                             | 2c brown red                                                               |
| August 1877                                    | 10c blue<br>20c ochre orange                                               |
| August 1879/1889<br><i>(Umberto I)</i>         | 20c orange<br>45c green olive<br>50c violet<br>60c violet                  |

|                                             |                                                                                                          |
|---------------------------------------------|----------------------------------------------------------------------------------------------------------|
|                                             | 1L brown and yellow                                                                                      |
| April 1891/1897                             | 2c red brown<br>10c carmine<br>20c orange                                                                |
| July 1901<br><i>(Vittorio Emanuele III)</i> | 2c red brown<br>10c carmine<br>45c green olive                                                           |
| September 1905                              | 15c on 20c orange                                                                                        |
| March 1913                                  | 2c on 10c red                                                                                            |
| December 1916                               | 20c orange                                                                                               |
| June 1923                                   | 20c green and orange                                                                                     |
| November 1919                               | 20c orange                                                                                               |
| November 1921                               | 10c carmine                                                                                              |
| 1923/1927                                   | 10c + 2c red<br>30c violet, brown and orange<br>50c carmine<br>60c orange<br>60c + 30c carmine and brown |
| July 1928                                   | 1,25L blue<br>75c red and pink<br>5c carmine<br>2c orange                                                |
| April 1929                                  | 2,55L red<br>15c orange                                                                                  |
| April 1929/1942                             | 1,75L orange<br>5L carmine                                                                               |
| November 1929/1933                          | 20c carmine<br>75c red<br>20c red                                                                        |
| May 1934                                    | 5L green                                                                                                 |
| October 1935                                | 25c ochre yellow<br>15L polychrome                                                                       |
| June 1937                                   | 20c red                                                                                                  |
| October 1938                                | 75c red                                                                                                  |
| Jennuary 1941                               | 20c orange<br>20c orange Mussolini<br>25c green<br>75c carmine                                           |
| September 1942                              | 50c violet                                                                                               |

### Italian Republic

| Issue Year      | Specimen       |
|-----------------|----------------|
| October 1945    | 3L red         |
| October 1950    | 10L dark green |
| March 1951      | 55L blue       |
| Septemeber 1957 | 60L blue       |

|                |                                                                                    |
|----------------|------------------------------------------------------------------------------------|
|                | 125L green                                                                         |
| 1958           | 15L green<br>25L red<br>25L blue<br>60L blue                                       |
| June 1959      | 110L yellow<br>60L polychrome                                                      |
| December 1960  | 15L grey and red<br>25L orange                                                     |
| 1962           | 15L polychrome<br>30L orange<br>30L red<br>70L blue                                |
| 1963           | 10L orange ochre<br>70L red                                                        |
| October 1964   | 500L red                                                                           |
| October 1965   | 20L blue<br>90L polychrome<br>130L red                                             |
| 1966/1967      | 20L polychrome<br>40L red<br>90L red<br>50L blue                                   |
| 1968           | 25L red<br>50L green<br>200L blue                                                  |
| May 1970       | 90L polychrome                                                                     |
| 1973/1975      | 20L polychrome<br>50L polychrome<br>70L polychrome                                 |
| March 1976     | 150L red green and black                                                           |
| September 1977 | 170L polychrome                                                                    |
| November 1978  | 120L polychrome                                                                    |
| 1980           | 70L red<br>80L polychrome<br>170L polychrome<br>220L polychrome<br>450L polychrome |
| 1981           | 300L polychrome<br>300L polychrome<br>300L polychrome                              |
| 1982           | 450L polychrome<br>900L polychrome                                                 |
| 1983           | 400L polychrome<br>1400L blue                                                      |
| 1984           | 400L polychrome                                                                    |
| 1986           | 550L polychrome<br>600L polychrome                                                 |
| 1988           | 750L polychrome<br>750L polychrome                                                 |

|            |                                                          |
|------------|----------------------------------------------------------|
|            | 750L polychrome                                          |
| April 1992 | 850L polychrome                                          |
| 2008       | 0,41€ polychrome<br>0,60€ polychrome<br>1,40€ polychrome |
| 2010       | 0,60€ polychrome<br>1,40€ polychrome                     |
| 2011       | 0,10€ polychrome<br>0,60€ polychrome                     |
